# Supplementary material for: Reinforcing hydrogen and carbon nanotube co-production via Cr–O–Ni catalyzed methane decomposition
Source: Royal Society of Chemistry journal article supplement (doi:10.1039/d3ta06921d), 2024-01-01
Supplement: d3ta06921d1.pdf [file d3ta06921d1.pdf]

**The Supplementary Information include:**

Fig. S1. XRD patterns of the control group Ni/Cr<sub>2</sub>O<sub>3</sub>.

Fig. S2. ATR patterns of the Ni<sub>x</sub>Cr<sub>2</sub> catalysts with different Ni/Cr ratios.

Fig. S3. Physical property analysis a) N<sub>2</sub> adsorption/desorption isotherms of the reduced Ni<sub>x</sub>Cr<sub>2</sub> catalysts; b) Pore size distributions of the reduced Ni<sub>x</sub>Cr<sub>2</sub> catalysts.

Fig. S4. Morphological characterization of control group Ni/Cr<sub>2</sub>O<sub>3</sub> a-d) HR-TEM; e-h) EDX mapping results of Cr, Ni, and O elements.

Fig. S5. SEM images of the Ni<sub>1.2</sub>Cr<sub>2</sub>.

Fig. S6. SEM images of the reduced Ni<sub>1.2</sub>Cr<sub>2</sub>.

Fig. S7. Evolution of H<sub>2</sub>, CH<sub>4</sub>, and CO concentrations at 750°C using control group Ni/Cr<sub>2</sub>O<sub>3</sub>.

Fig. S8. Outlet gas concentration and H<sub>2</sub> yield of CMD with different Ni/Cr ratios within 60 minutes on a) Cr<sub>2</sub>O<sub>3</sub>; b) reduced Ni<sub>0.4</sub>Cr<sub>2</sub>; c) reduced Ni<sub>0.8</sub>Cr<sub>2</sub>; d) reduced Ni<sub>1.2</sub>Cr<sub>2</sub>; e) reduced Ni<sub>1.6</sub>Cr<sub>2</sub>; f) reduced Ni<sub>2.0</sub>Cr<sub>2</sub>.

Fig. S9. Outlet gas concentration and H<sub>2</sub> yield of CMD with different temperature within 60 minutes on reduced Ni<sub>1.2</sub>Cr<sub>2</sub> in a) 650°C; b) 700°C; c) 750°C; d) 800°C; e) 850°C; f) 900°C.

Fig. S10. CH<sub>4</sub> conversion at different methane flows. Reaction conditions: gas flow rate 50 mL min<sup>-1</sup>, GHSV=3000 h<sup>-1</sup>.

Fig. S11. H<sub>2</sub> concentration at different methane flows. Reaction conditions: gas flow rate 50 mL min<sup>-1</sup>, GHSV=3000 h<sup>-1</sup>.

Fig. S12. Outlet gas concentrations and H<sub>2</sub> yields at 20 minutes at different methane flows. Reaction conditions: gas flow rate 50 mL min<sup>-1</sup>, GHSV=3000 h<sup>-1</sup>.

Fig. S13. CH<sub>4</sub> conversion at 20 minutes at different methane flows. Reaction conditions: gas flow rate 50 mL min<sup>-1</sup>, GHSV=3000 h<sup>-1</sup>.

Fig. S14. Cyclic stability test of reduced Ni<sub>1.2</sub>Cr<sub>2</sub>: a) H<sub>2</sub> concentration during 10 cycles; b) CO concentration during 10 cycles.

Fig. S15. a) N<sub>2</sub> adsorption/desorption isotherms of reacted Ni<sub>x</sub>Cr<sub>2</sub> catalysts; b) Pore size distributions of reacted catalysts.

Fig. S16. XRD patterns of the reacted Ni<sub>x</sub>Cr<sub>2</sub> catalysts with different Ni/Cr ratios.

Fig. S17. XRD patterns of the reacted Ni<sub>1.2</sub>Cr<sub>2</sub> at different methane concentrations.

Fig. S18. TEM images of the 1 h reacted Ni<sub>1.2</sub>Cr<sub>2</sub> at 750°C.

Fig. S19. TEM images of the 1 h reacted Ni<sub>1.2</sub>Cr<sub>2</sub> at 800°C.

Fig. S20. SEM of the reacted Ni<sub>1.2</sub>Cr<sub>2</sub> catalysts after 1 h CMD.

Fig. S21. Raman spectra for a) reacted Ni<sub>x</sub>Cr<sub>2</sub> catalysts; b) pure Cr<sub>2</sub>O<sub>3</sub> and Ni.

Fig. S22. a) Raman profiles of reduced Ni<sub>1.2</sub>Cr<sub>2</sub> at 700°C and 800°C; b) H<sub>2</sub> concentration on reduced

Ni<sub>1.2</sub>Cr<sub>2</sub> at 700°C and 800°C (CMD at 750°C).

Fig. S23. NH<sub>3</sub>-TPD profiles of the reduced Ni<sub>x</sub>Cr<sub>2</sub> catalysts with different Ni/Cr ratios.

Fig. S24. H<sub>2</sub>-TPD profiles of the reduced Ni<sub>x</sub>Cr<sub>2</sub> catalysts with different Ni/Cr ratios.

Fig. S25. XPS O 1s spectra of the reduced Ni<sub>1.2</sub>Cr<sub>2</sub> and Ni/Cr<sub>2</sub>O<sub>3</sub> catalysts.

Fig. S26. Ni K-edge XANES spectra of control group Ni/Cr<sub>2</sub>O<sub>3</sub> catalyst and reference samples.

Fig. S27. Fourier transformed (FT)  $k^3$ -weighted  $\chi(k)$ -function of the EXAFS spectra for Ni K-edge of control group Ni/Cr<sub>2</sub>O<sub>3</sub>.

Fig. S28. Cr K-edge XANES spectra of the control group Ni/Cr<sub>2</sub>O<sub>3</sub> catalyst and reference samples.

Fig. S29. Fourier transformed (FT)  $k^3$ -weighted  $\chi(k)$ -function of the EXAFS spectra for Cr K-edge of the control group Ni/Cr<sub>2</sub>O<sub>3</sub>.

Fig. S30. Ni EXAFS spectra for each sample in  $k$  space.

Fig. S31. Cr EXAFS spectra for each sample in  $k$  space.

Fig. S32. Wavelet transforms for the  $k^3$ -weighted EXAFS signals of Ni for control group Ni/Cr<sub>2</sub>O<sub>3</sub>.

Fig. S33. Wavelet transforms for the  $k^3$ -weighted EXAFS signals of Cr for the control group Ni/Cr<sub>2</sub>O<sub>3</sub>.

Fig. S34. Transition state images for CMD on Ni surfaces. Spheres: gray= Ni, pink= H, and dark brown= C.

Fig. S35. Transition state images for CMD on Cr<sub>2</sub>O<sub>3</sub> surfaces. Spheres: blue= Cr, red= O, pink= H, and dark brown= C.

Table S1 Cell parameters of DFT model.

Table S2 Metal contents of the Ni<sub>x</sub>Cr<sub>2</sub> catalysts.

Table S3 Physiochemical properties of reduced Ni<sub>x</sub>Cr<sub>2</sub> catalysts.

Table S4 Summary of BET characteristics of the 1h reacted Ni<sub>x</sub>Cr<sub>2</sub> catalysts.

Table S5 Summary of XPS characteristics of reduced Ni<sub>1.2</sub>Cr<sub>2</sub> and Ni/Cr<sub>2</sub>O<sub>3</sub> catalysts.

Table S6 The coordination parameters of Ni for investigated samples.

Table S7 The coordination parameters of Cr for investigated samples.

Table S8 Transition state results of methane decomposition on Ni(111), Cr<sub>2</sub>O<sub>3</sub>(012), and Ni(111)/Cr<sub>2</sub>O<sub>3</sub>(012).

# Characterizations of the as-prepared and reduced catalysts

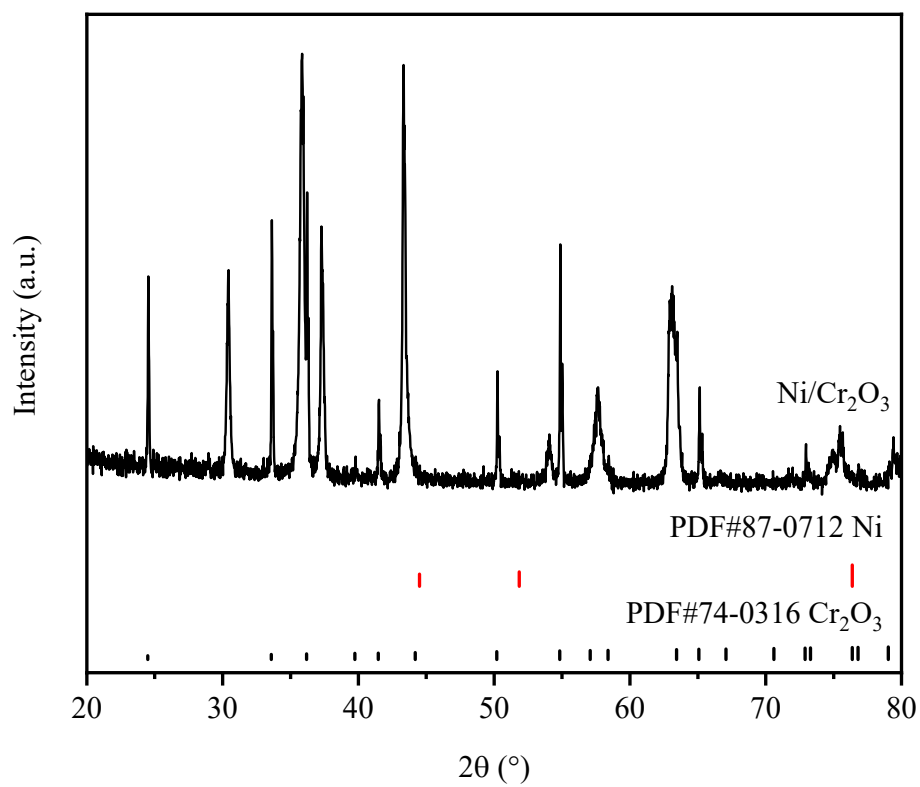

**Fig. S1.** XRD patterns of the control Ni/Cr<sub>2</sub>O<sub>3</sub>.

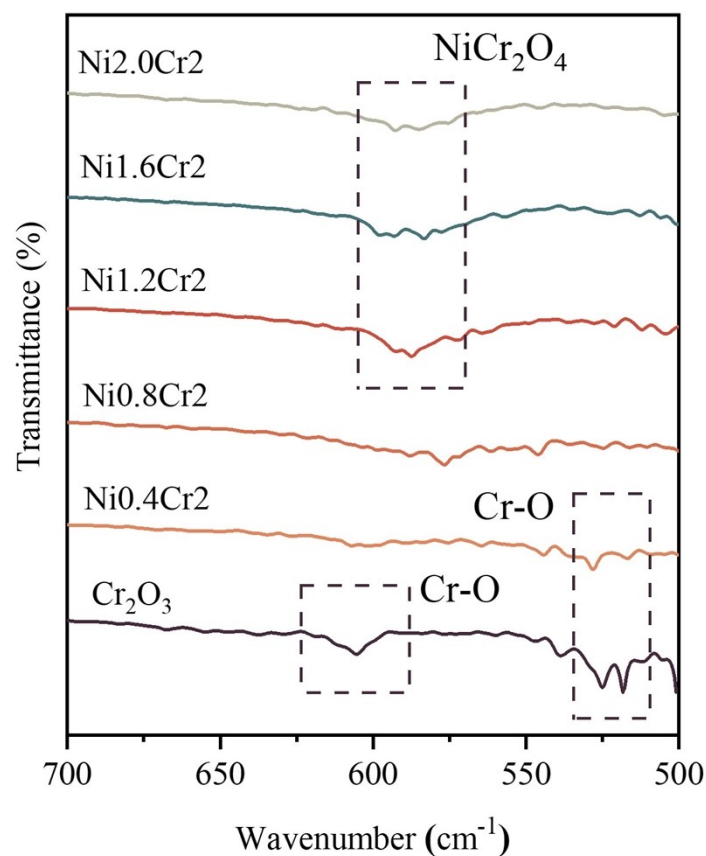

**Fig. S2.** ATR patterns of the  $\text{Ni}_x\text{Cr}_2$  catalysts with different Ni/Cr ratios.

For cubic spinel, four infrared vibrations were reported, in which two are located within  $600\text{--}400\text{ cm}^{-1}$  and the other two that are difficult to be recorded are at low frequencies of  $300\text{--}200\text{ cm}^{-1}$ . The peak located at approximately  $530\text{ cm}^{-1}$  is attributed to the vibration of the Cr-O bond, whereas the peak at  $595\text{ cm}^{-1}$  belongs to the characteristic band of the  $\text{NiCr}_2\text{O}_4$  spinel. These results further confirm the generation of  $\text{NiCr}_2\text{O}_4$  spinel oxides under  $\text{Ni/Cr ratio} \geq 0.6$  conditions.

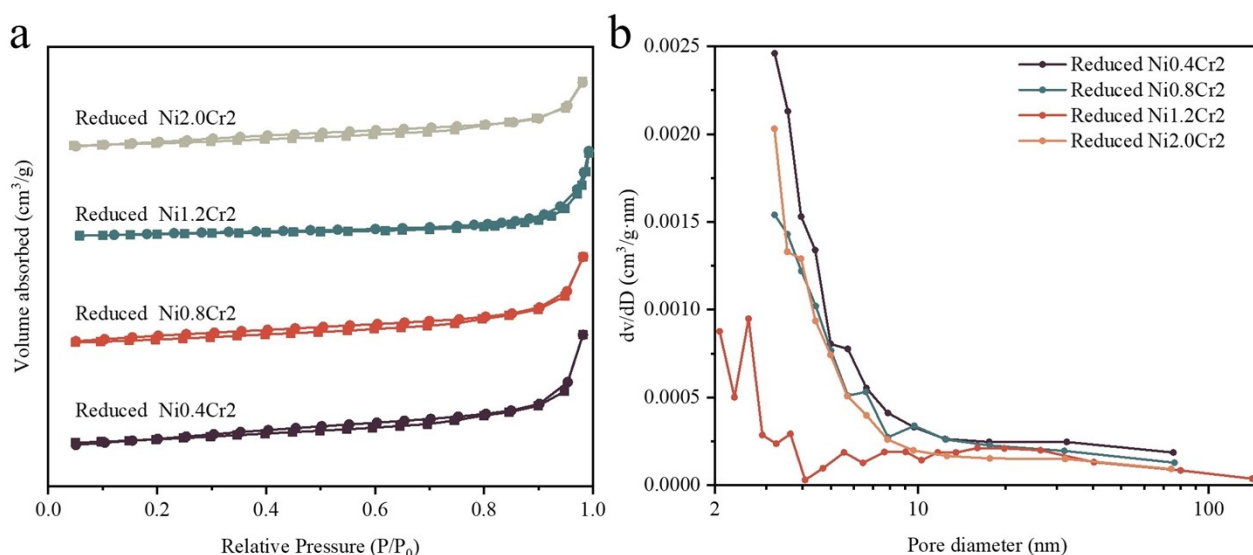

**Fig. S3.** Physical property analysis a)  $N_2$  adsorption/desorption isotherms of the reduced  $Ni_xCr_2$  catalysts; b) Pore size distributions of the reduced  $Ni_xCr_2$  catalysts.

All the samples exhibited isotherms, indicating the mesoporous structure of the hydrogen-reduced  $NiCr_2O_4$  catalysts. The BET surface areas, pore size distributions, and pore volumes of the hydrogen-reduced  $NiCr_2O_4$  catalysts are summarised in Table S2. Specifically, the increase in the Ni/Cr ratios results in the reduction of their BET surface areas, possibly attributing to the pore structure coverage of  $Cr_2O_{3-\delta}$  oxides by Ni.

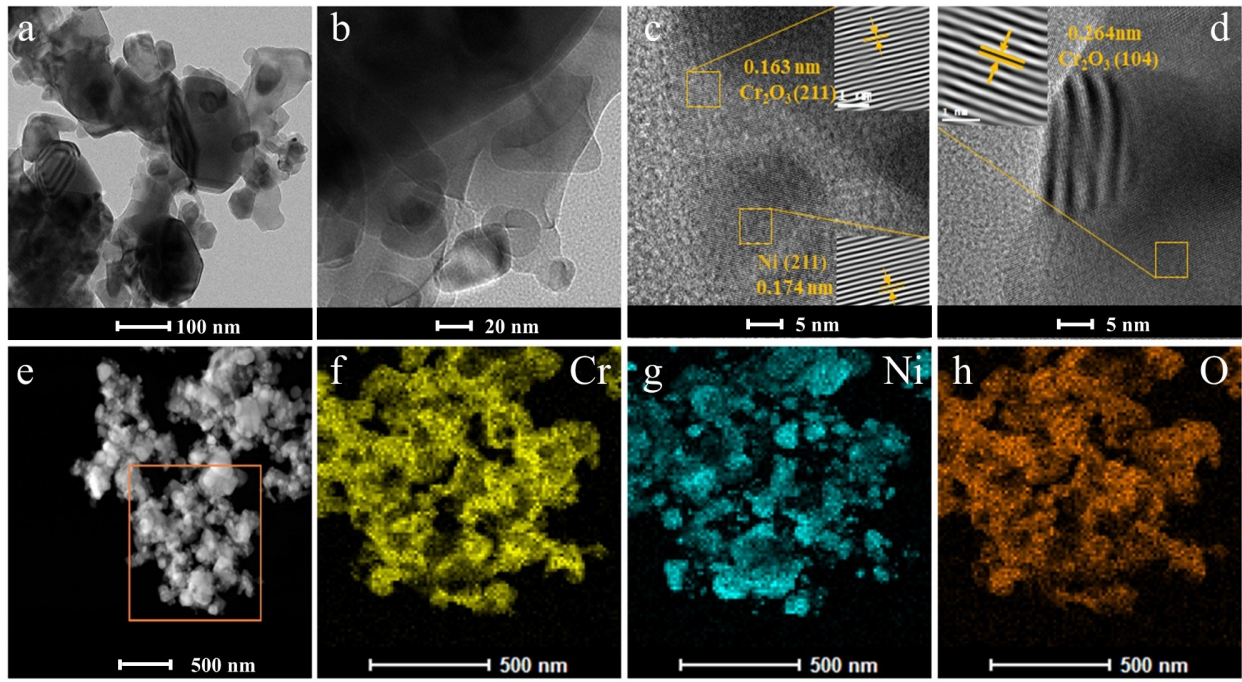

**Fig. S4.** Morphological characterization of control Ni/Cr<sub>2</sub>O<sub>3</sub> a-d) HR-TEM; e-h) EDX mapping results of Cr, Ni, and O elements.

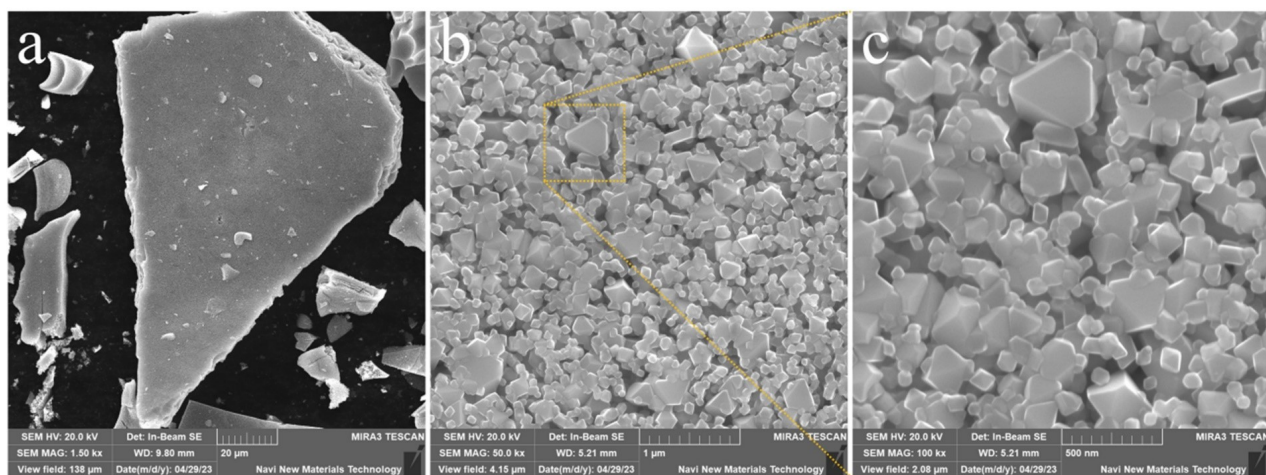

**Fig. S5.** SEM images of the  $\text{Ni}_{1.2}\text{Cr}_2$ .

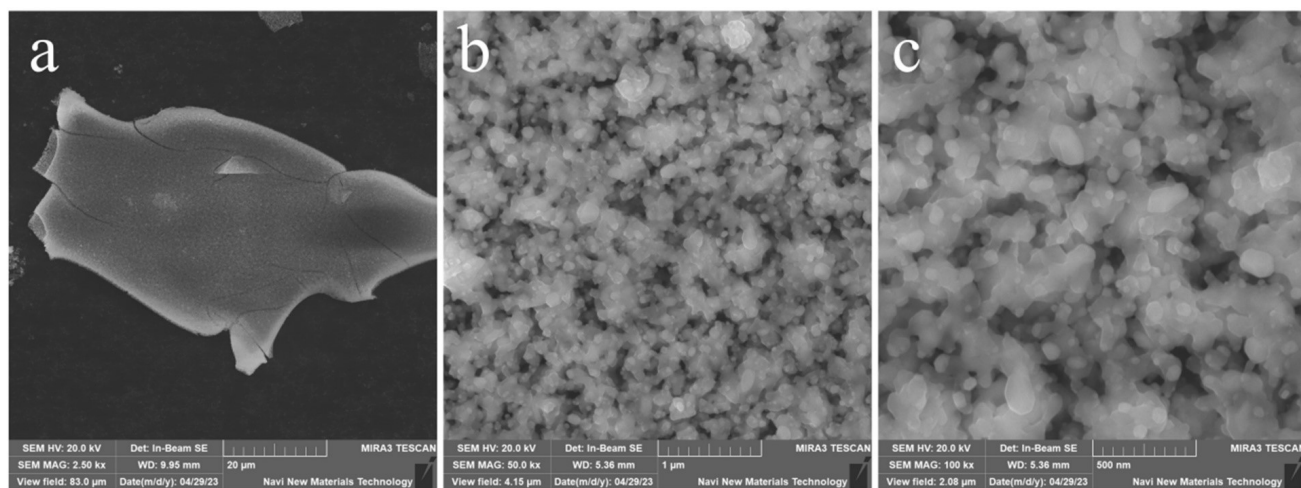

**Fig. S6.** SEM images of the reduced  $\text{Ni}_{1.2}\text{Cr}_2$ .



## Catalytic methane decomposition

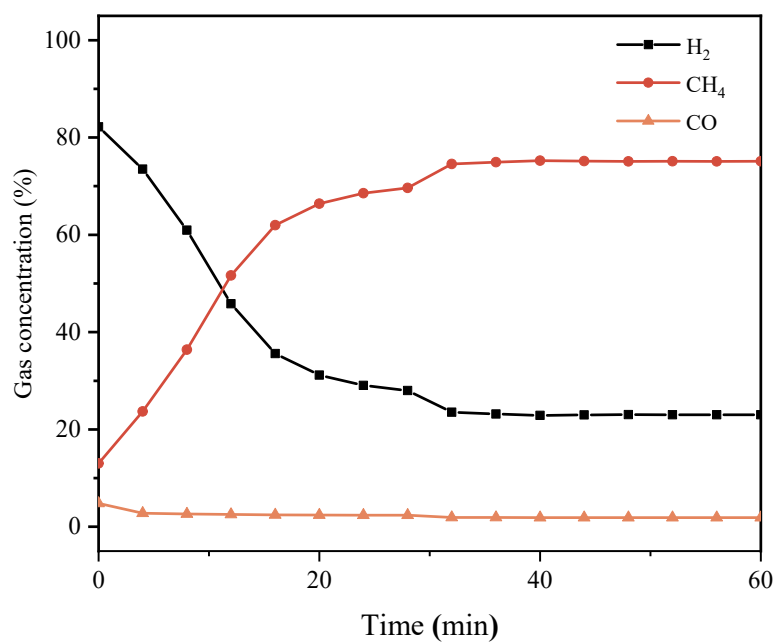

**Fig. S7.** Evolution of H<sub>2</sub>, CH<sub>4</sub>, and CO concentrations at 750°C using control group Ni/Cr<sub>2</sub>O<sub>3</sub>.

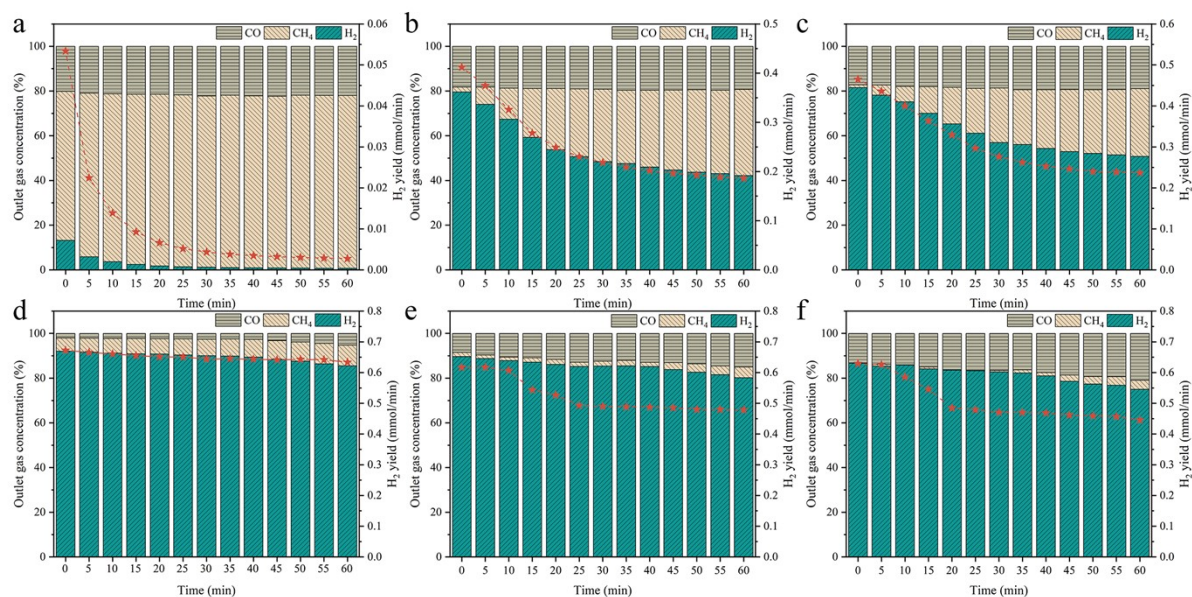

**Fig. S8.** Outlet gas concentration and H<sub>2</sub> yield of CMD with different Ni/Cr ratios within 60 minutes on a) Cr<sub>2</sub>O<sub>3</sub>; b) reduced Ni<sub>0.4</sub>Cr<sub>2</sub>; c) reduced Ni<sub>0.8</sub>Cr<sub>2</sub>; d) reduced Ni<sub>1.2</sub>Cr<sub>2</sub>; e) reduced Ni<sub>1.6</sub>Cr<sub>2</sub>; f) reduced Ni<sub>2.0</sub>Cr<sub>2</sub>.

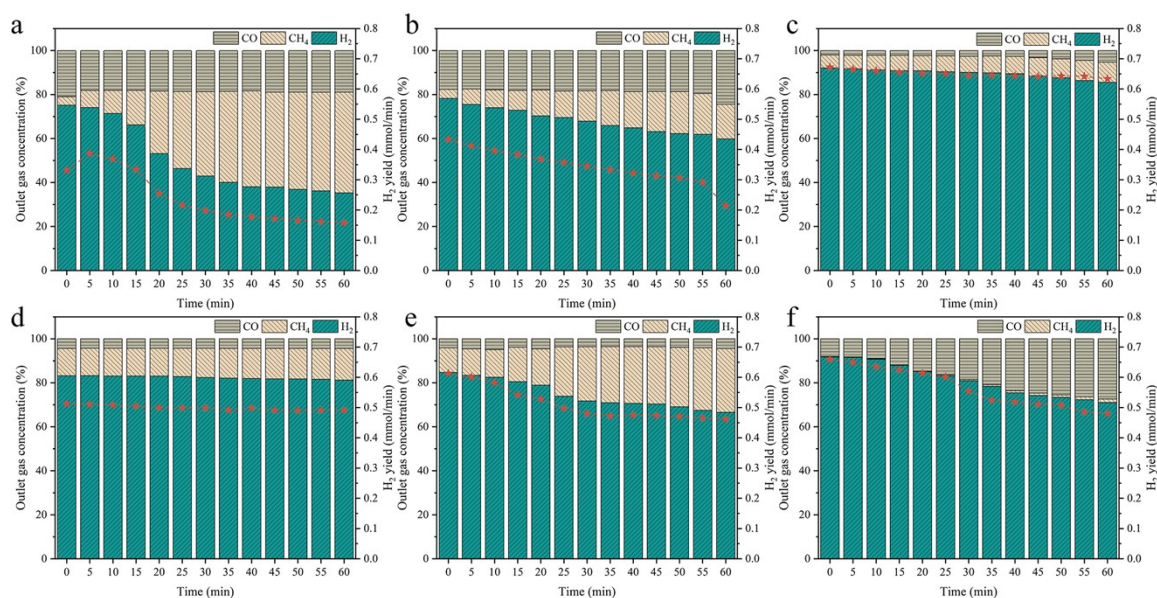

**Fig. S9.** Outlet gas concentration and H<sub>2</sub> yield of CMD with different temperatures within 60 minutes on reduced Ni<sub>1.2</sub>Cr<sub>2</sub> in a) 650°C; b) 700°C; c) 750°C; d) 800°C; e) 850°C; f) 900°C.

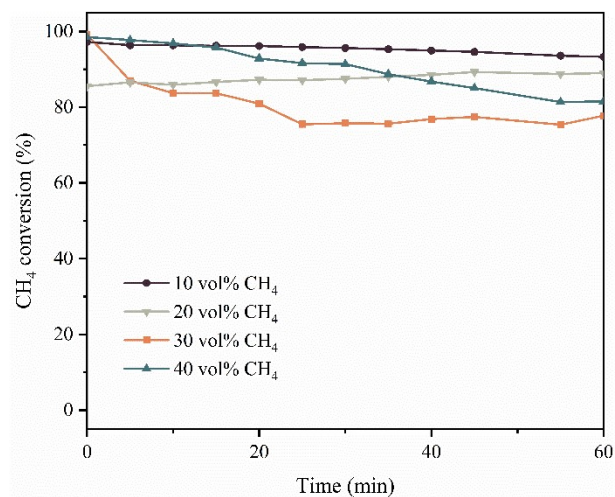

**Fig. S10.** CH<sub>4</sub> conversion at different methane flows. Reaction conditions: gas flow rate 50 mL min<sup>-1</sup>, GHSV=3000 h<sup>-1</sup>.

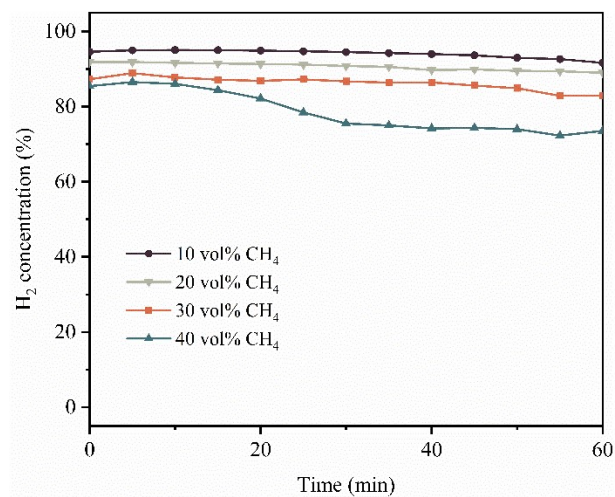

**Fig. S11.** H<sub>2</sub> concentration at different methane flows. Reaction conditions: gas flow rate 50 mL min<sup>-1</sup>, GHSV=3000 h<sup>-1</sup>.

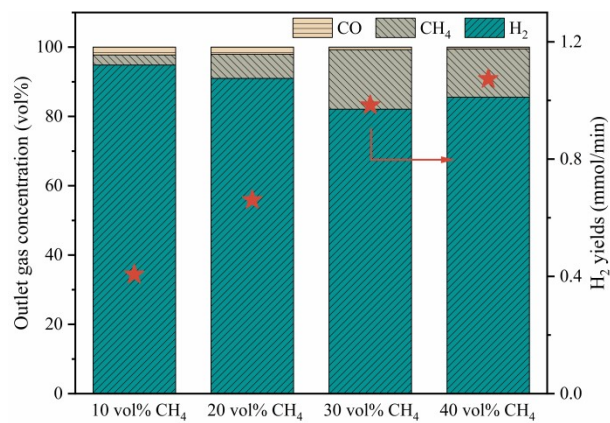

**Fig. S12.** Outlet gas concentrations and H<sub>2</sub> yields at 20 minutes at different methane flows. Reaction conditions: gas flow rate 50 mLmin<sup>-1</sup>, GHSV=3000 h<sup>-1</sup>.

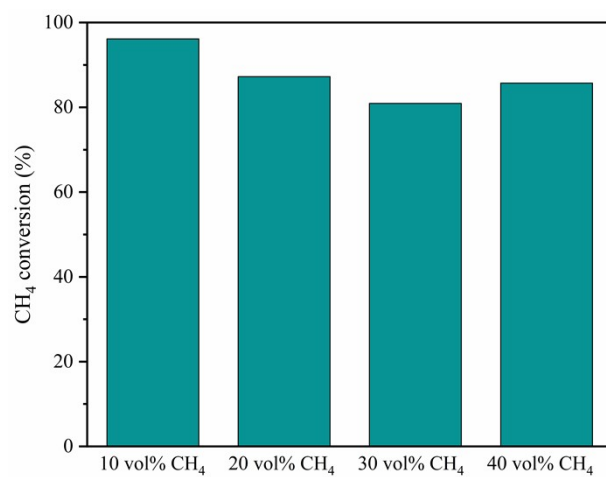

**Fig. S13.** CH<sub>4</sub> conversion at 20 minutes at different methane flows. Reaction conditions: gas flow rate 50 mL min<sup>-1</sup>, GHSV=3000 h<sup>-1</sup>.

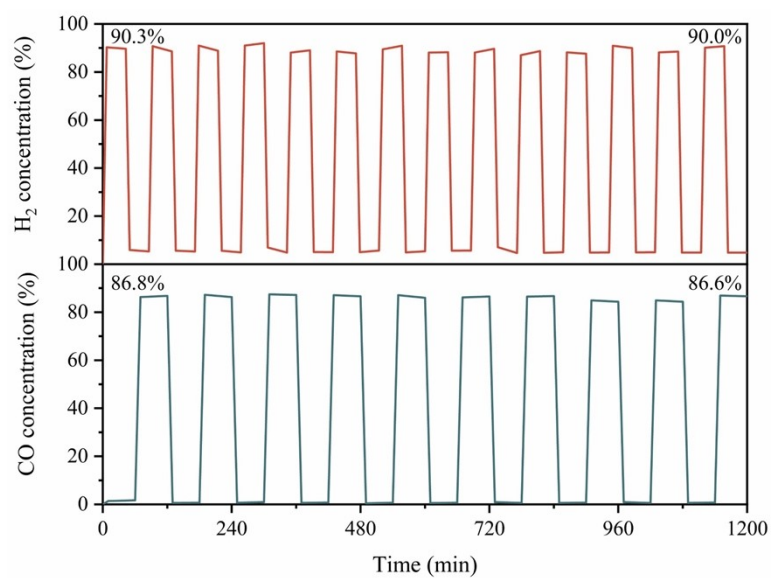

**Fig. S14.** Cyclic stability test of reduced Ni<sub>1.2</sub>Cr<sub>2</sub>: a) H<sub>2</sub> concentration during 10 cycles; b) CO concentration during 10 cycles.



## Characterizations of the reacted catalysts

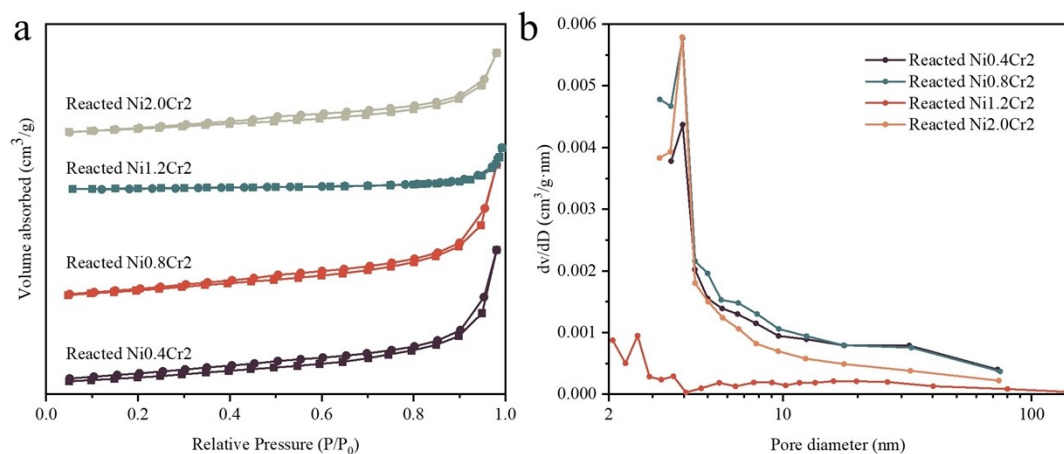

**Fig. S15.** a)  $\text{N}_2$  adsorption/desorption isotherms of reacted  $\text{Ni}_x\text{Cr}_2$  catalysts; b) Pore size distributions of reacted  $\text{Ni}_x\text{Cr}_2$  catalysts.

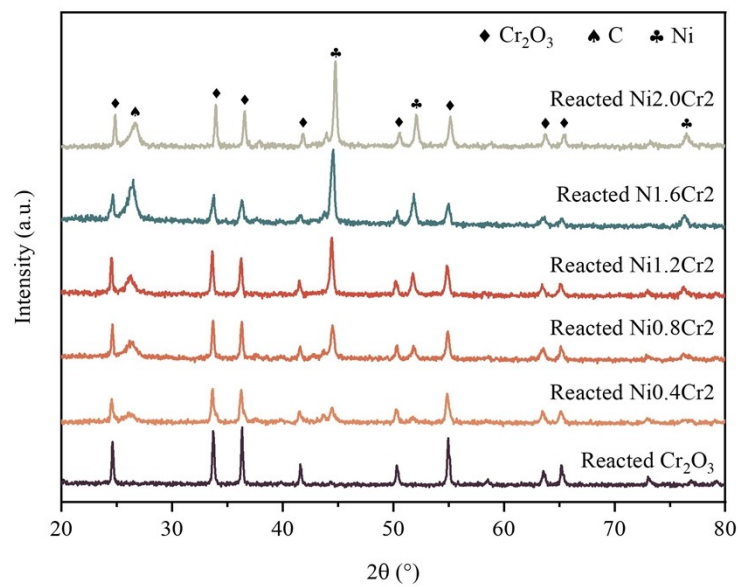

**Fig. S16.** XRD patterns of the reacted  $\text{Ni}_x\text{Cr}_2$  catalysts with different Ni/Cr ratios.

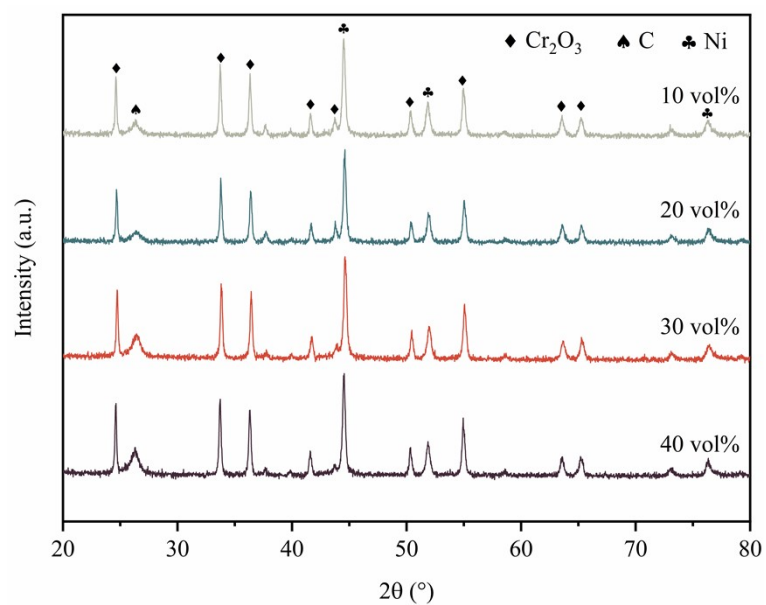

**Fig. S17.** XRD patterns of the reacted  $\text{Ni}_{1.2}\text{Cr}_2$  at different methane concentrations.

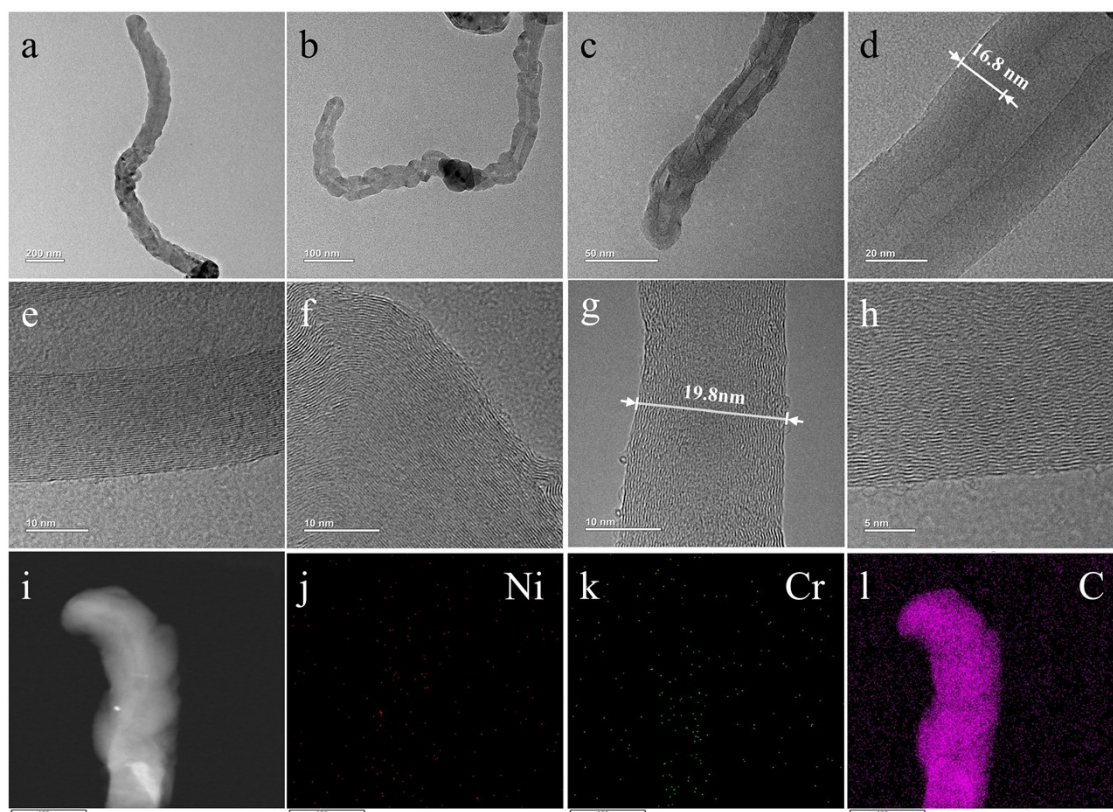

**Fig. S18.** TEM images of the 1 h reacted Ni<sub>1.2</sub>Cr<sub>2</sub> at 750°C.

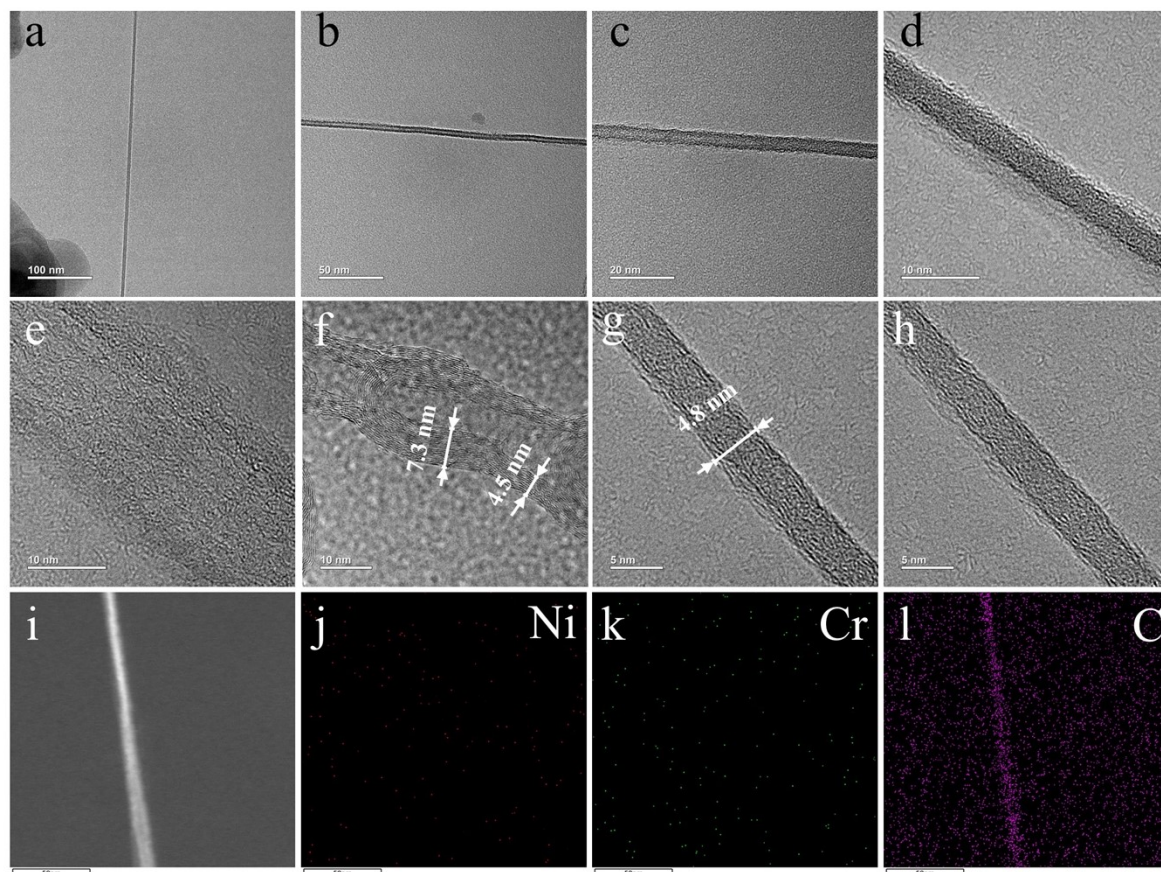

**Fig. S19.** TEM images of the 1 h reacted  $\text{Ni}_{1.2}\text{Cr}_2$  at  $800^\circ\text{C}$ .

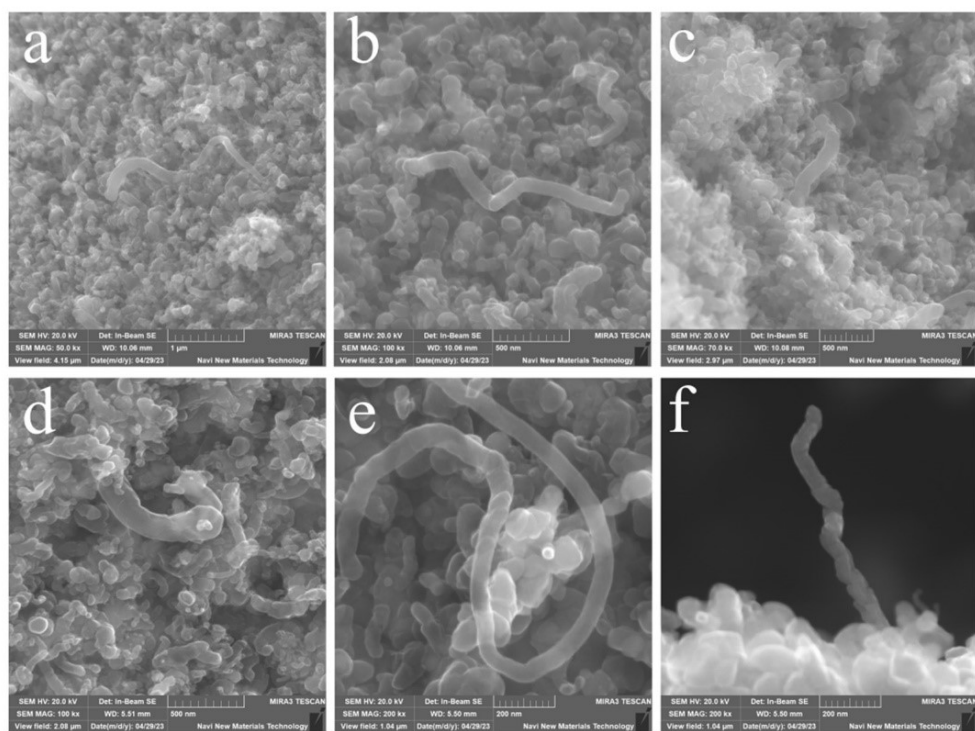

**Fig. S20.** SEM images of 1h reacted  $\text{Ni}_{1.2}\text{Cr}_2$  catalyst.

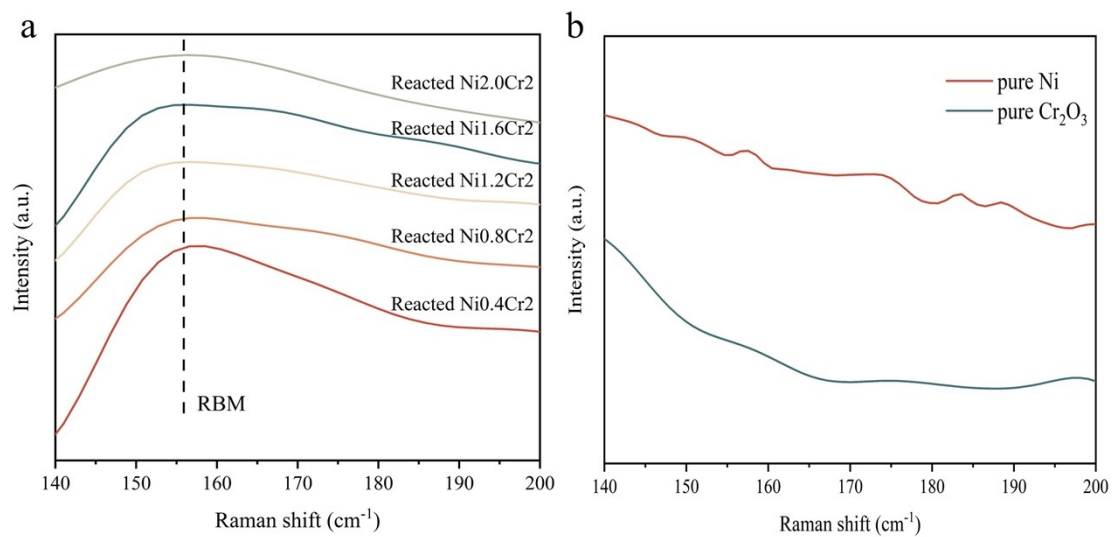

**Fig. S21.** Raman spectra for a) reacted  $\text{Ni}_x\text{Cr}_2$  catalysts; b) pure  $\text{Cr}_2\text{O}_3$  and Ni.



## Structure identification and mechanism revelation

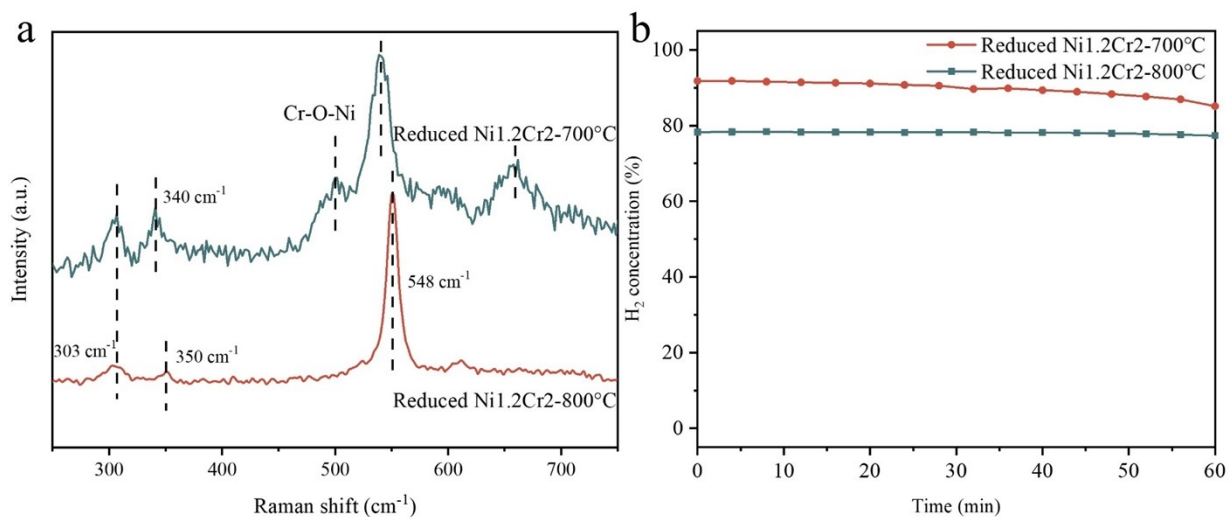

**Fig. S22.** a) Raman profiles of reduced  $\text{Ni}_{1.2}\text{Cr}_2$  at  $700^\circ\text{C}$  and  $800^\circ\text{C}$ ; b)  $\text{H}_2$  concentration on reduced  $\text{Ni}_{1.2}\text{Cr}_2$  at  $700^\circ\text{C}$  and  $800^\circ\text{C}$  (CMD at  $750^\circ\text{C}$ ).



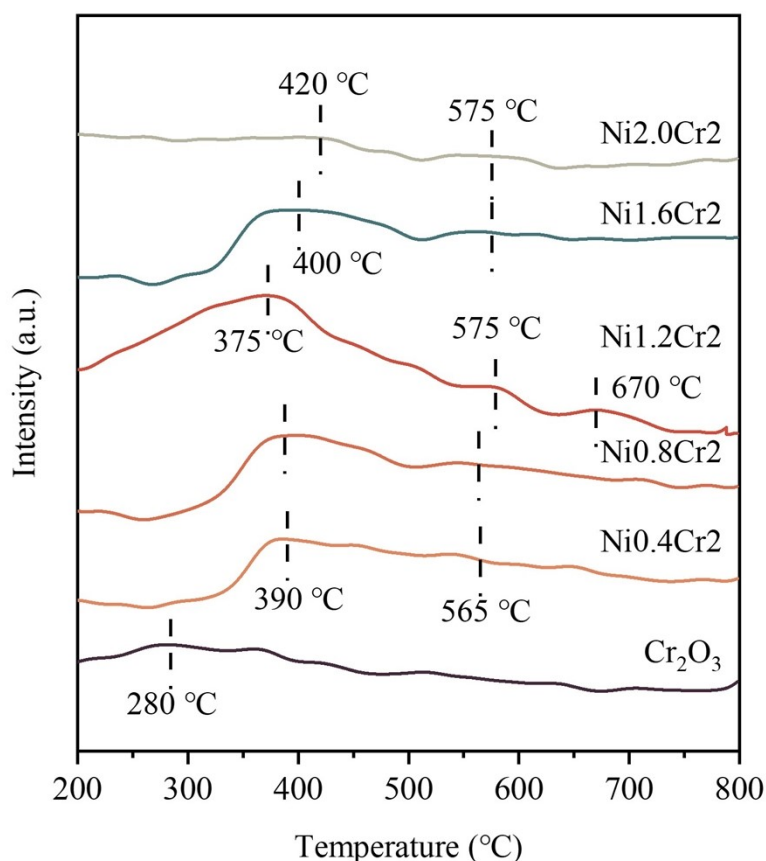

**Fig. S23.**  $\text{NH}_3$ -TPD profiles of the reduced  $\text{Ni}_x\text{Cr}_2$  catalysts with different Ni/Cr ratios.

In the  $\text{NH}_3$ -TPD spectra of  $\text{Cr}_2\text{O}_3$ , a low temperature peak can be observed at about  $280^\circ\text{C}$ , which is attributed to the existence of Lewis acid sites due to the absorbed ammonia on the terminal -OH groups. In addition, as the Ni/Cr ratios gradually increases, moderate- and high-temperature peaks appear, which are assigned to the strong Brønsted acid sites. For reduced  $\text{Ni}_{1.2}\text{Cr}_2$ , the temperature peak shifted to  $375^\circ\text{C}$ , indicating the enhancement in the combining capability between -OH and ammonia. This could be attributed to the formation of the Cr-O-Ni structure. Additionally, the peaks located at  $575^\circ\text{C}$  and  $670^\circ\text{C}$  were clearly observed, which was assigned as the strong Brønsted acid sites at the surface of the reduced  $\text{Ni}_{1.2}\text{Cr}_2$ . This could be the dominant for methane activation. Meanwhile, the total capacity of  $\text{NH}_3$  adsorbed can be calculated by integrating the  $\text{NH}_3$ -TPD spectrum. It is found that the integral area of the reduced  $\text{Ni}_{1.2}\text{Cr}_2$  is much larger than those of other catalysts, thus performing highly activated performance on CMD.

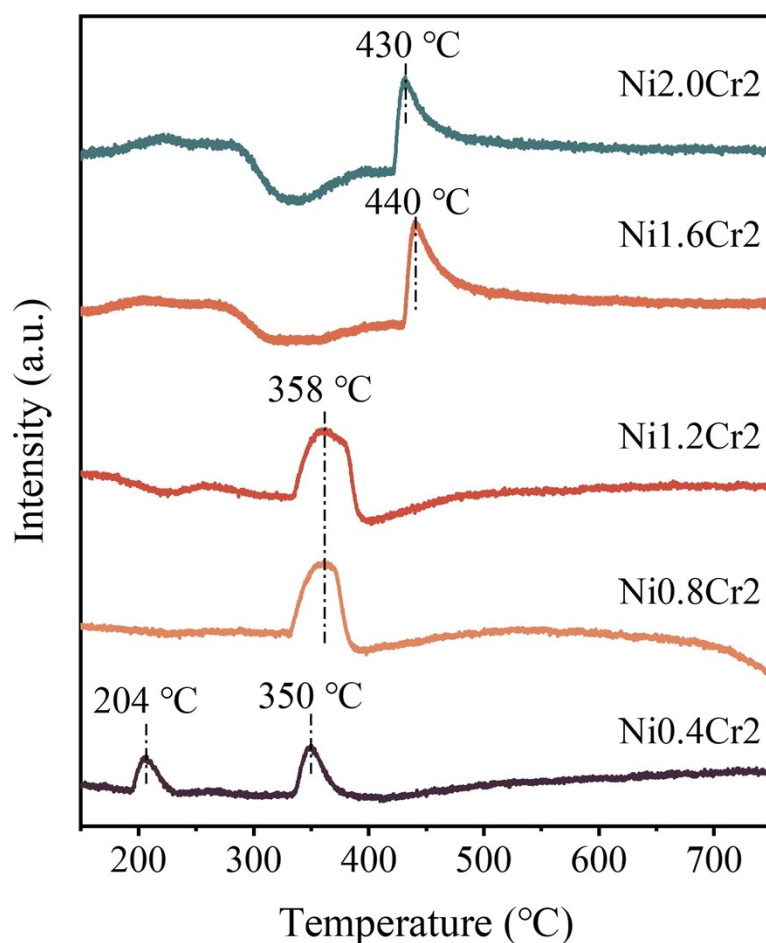

**Fig. S24.** H<sub>2</sub>-TPD profiles of the reduced catalysts with different Ni/Cr ratios.

The peak shifted to higher temperatures with the increase in the Ni/Cr ratios. This phenomenon may be due to the strong adsorption of hydrogen on the catalyst surface, or the desorption of hydrogen tightly bound to the catalyst matrix or the escaped hydrogen, which would improve hydrogen storage capacity. Meanwhile, integrating the catalysts of various proportions, the integrated area of reduced Ni<sub>1.2</sub>Cr<sub>2</sub> is larger than the rest of the catalysts. The surface has higher nickel dispersion, and more surface dissociated hydrogen is formed on the catalyst. It indicates that the addition of nickel is closely related with the H<sub>2</sub> chemisorption ability in the process of CMD.

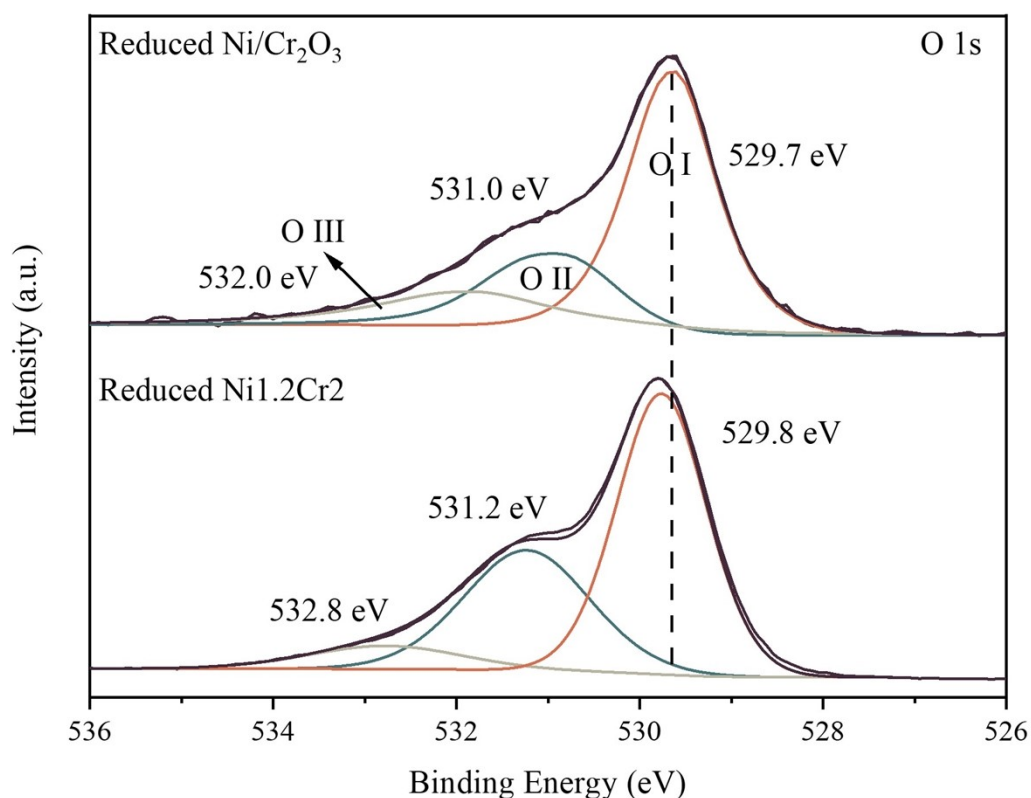

**Fig. S25.** XPS O 1s spectra of the reduced Ni<sub>1.2</sub>Cr<sub>2</sub> and Ni/Cr<sub>2</sub>O<sub>3</sub> catalysts.

The O 1s spectra of the reduced Ni<sub>1.2</sub>Cr<sub>2</sub> and Ni/Cr<sub>2</sub>O<sub>3</sub> catalysts are shown in Fig. S25. The O 1s spectra were divided into three peaks at 529.8 eV (OI), 531.2 eV (OII), and 532.3 eV (OIII), which belong to lattice oxygen, oxygen vacancies, and surface –OH or CO<sub>3</sub><sup>2-</sup> at the catalyst surface <sup>30</sup>, respectively. Specifically, the OI/OII ratios of the reduced NiO/Cr<sub>2</sub>O<sub>3</sub> and Ni<sub>1.2</sub>Cr<sub>2</sub> were 2.50 and 1.60, respectively. This demonstrates rich oxygen vacancy beyond the surface of the reduced Ni<sub>1.2</sub>Cr<sub>2</sub> sample. Consequently, the abundant oxygen vacancy formed can effectively promote methane activation and the surface Ni<sup>+δ</sup> formed can provide moderate lattice oxygen, thus synergistically promoting methane decomposition.

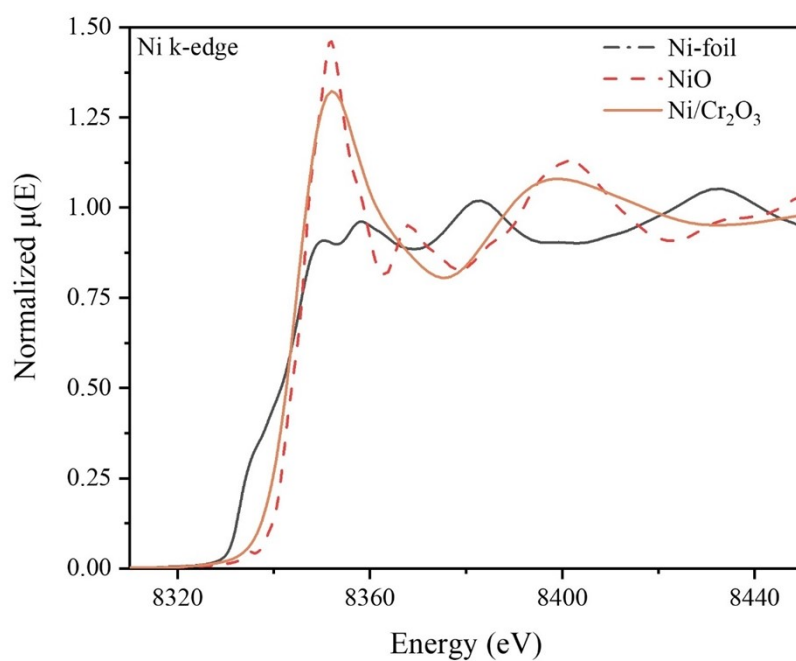

**Fig. S26.** Ni K-edge XANES spectra of the control group Ni/Cr<sub>2</sub>O<sub>3</sub> catalyst and reference samples.

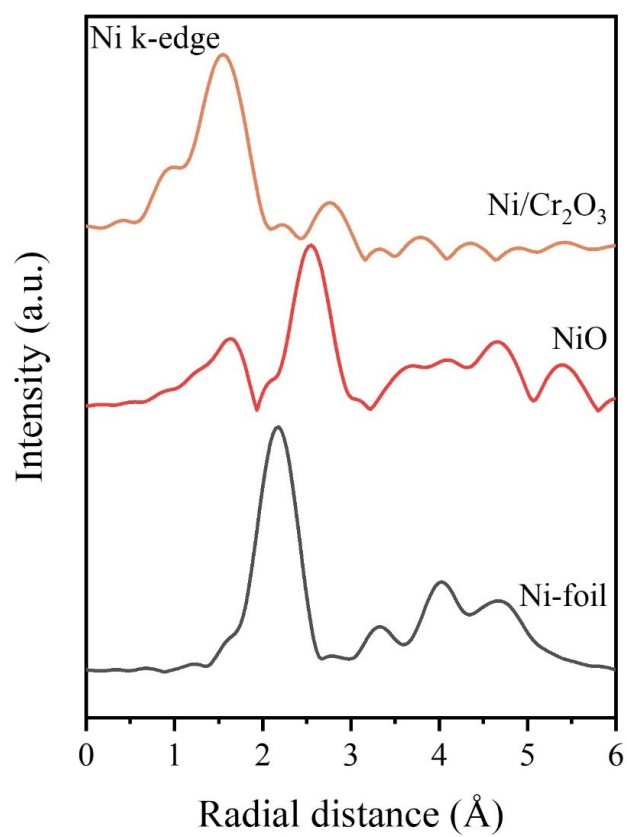

**Fig. S27.** Fourier transformed (FT)  $k^3$ -weighted  $\chi(k)$ -function of the EXAFS spectra for Ni K-edge of control group Ni/Cr<sub>2</sub>O<sub>3</sub>.

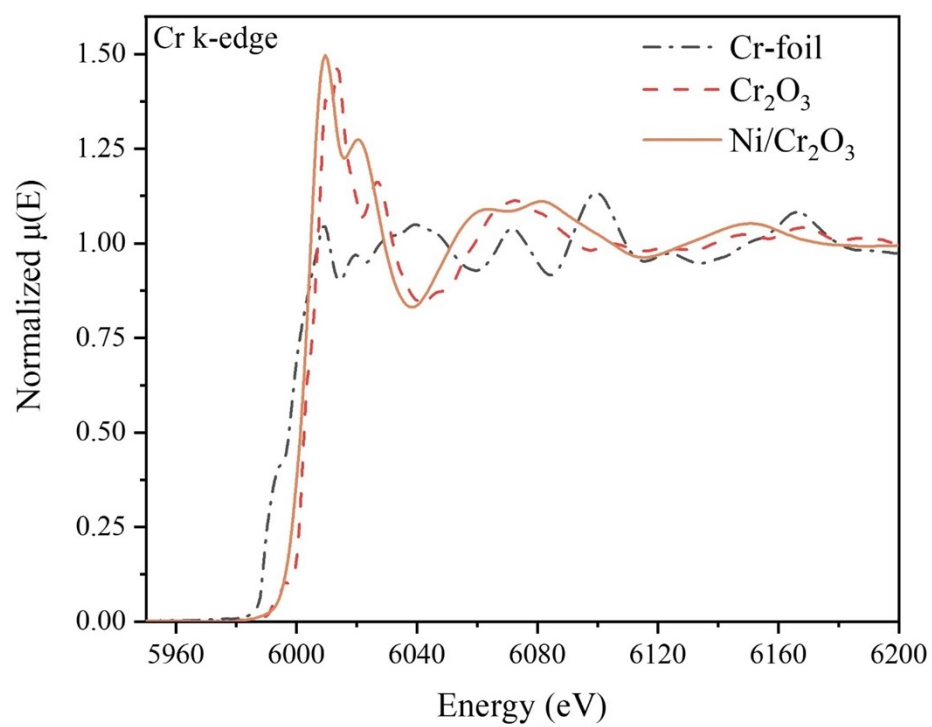

**Fig. S28.** Cr K-edge XANES spectra of the contral group Ni/ $\text{Cr}_2\text{O}_3$  catalyst and reference samples.

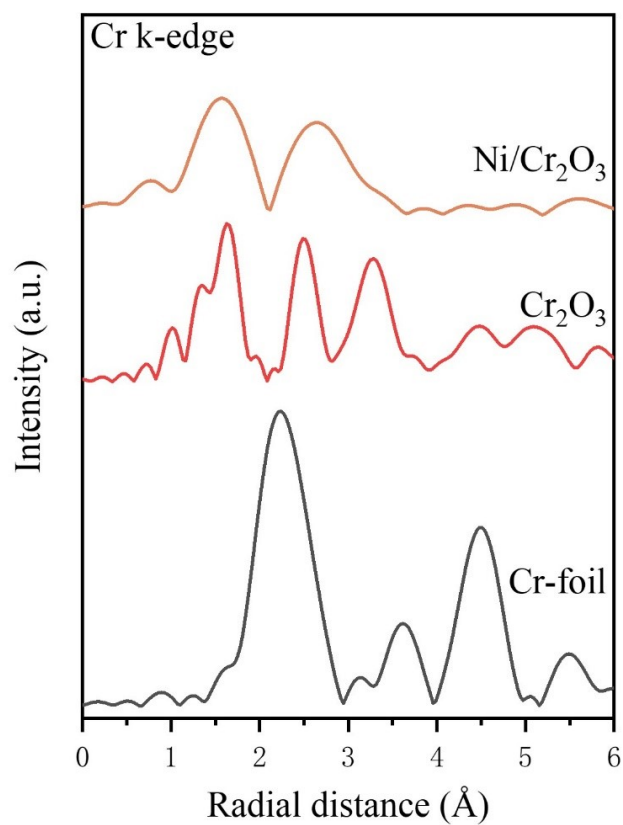

**Fig. S29.** Fourier transformed (FT)  $k^3$ -weighted  $\chi(k)$ -function of the EXAFS spectra for Cr K-edge of the control group Ni/Cr<sub>2</sub>O<sub>3</sub>.

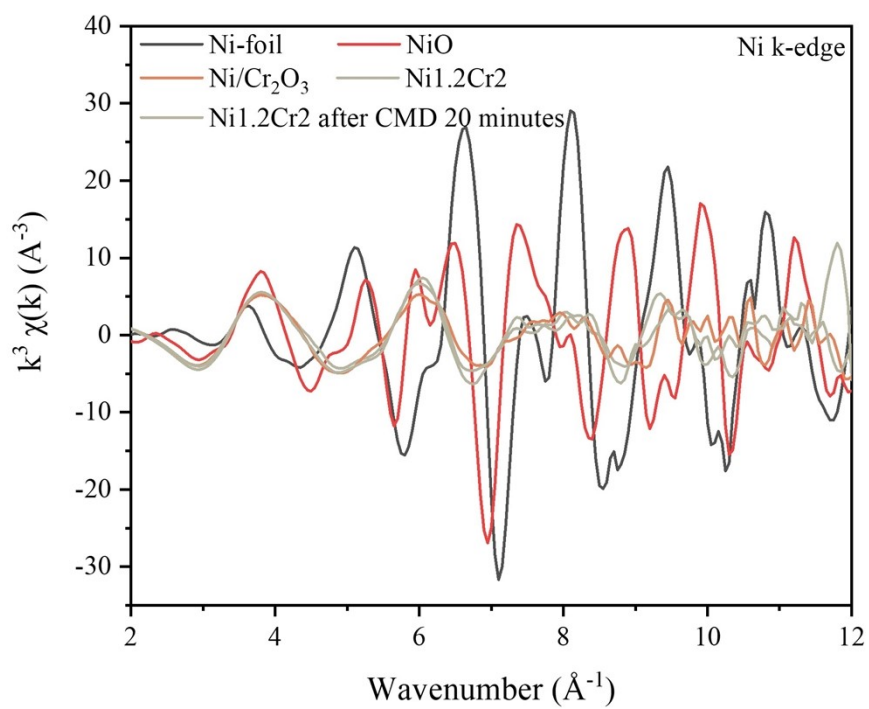

**Fig. S30.** Ni EXAFS spectra for each sample in k space.



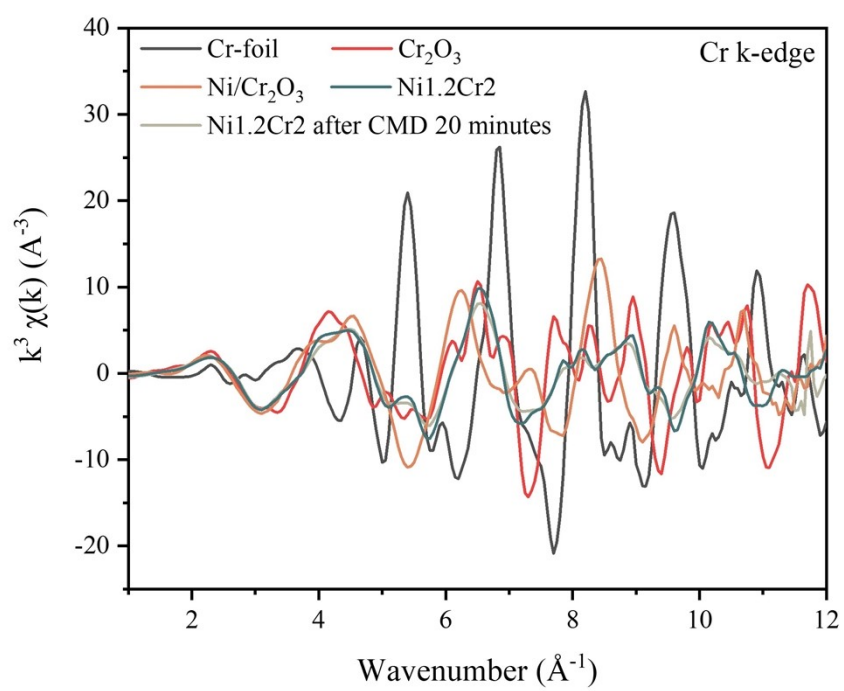

**Fig. S31.** Cr EXAFS spectra for each sample in k space.

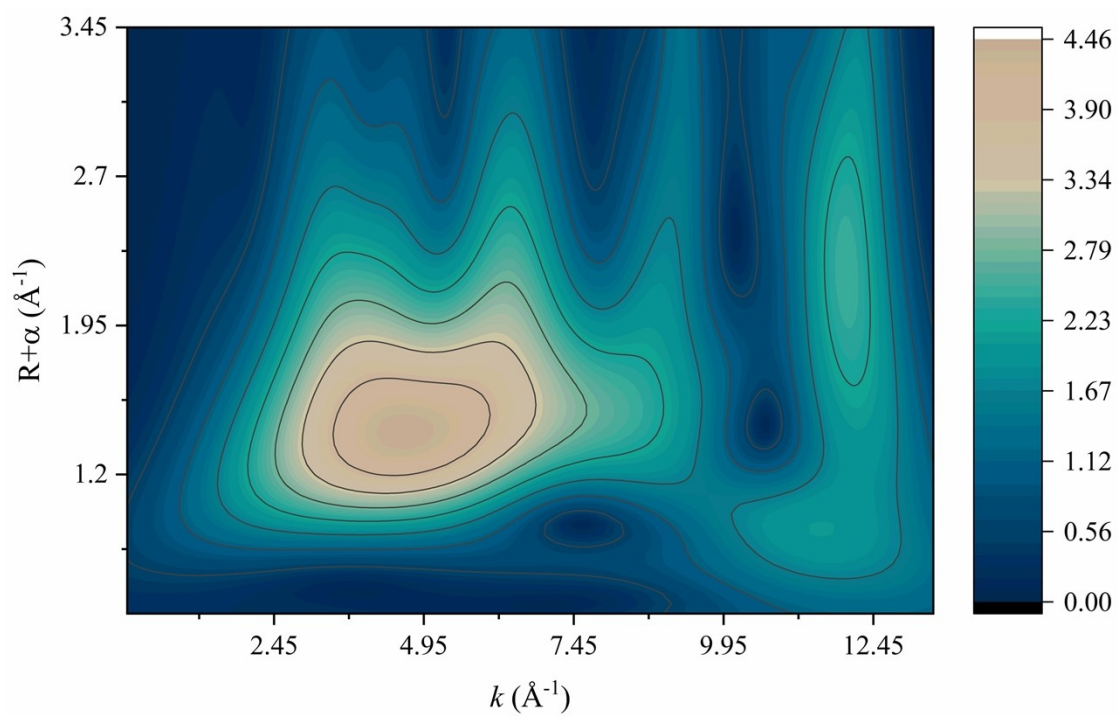

**Fig. S32.** Wavelet transforms for the  $k^3$ -weighted EXAFS signals of Ni for the control group Ni/Cr<sub>2</sub>O<sub>3</sub>.

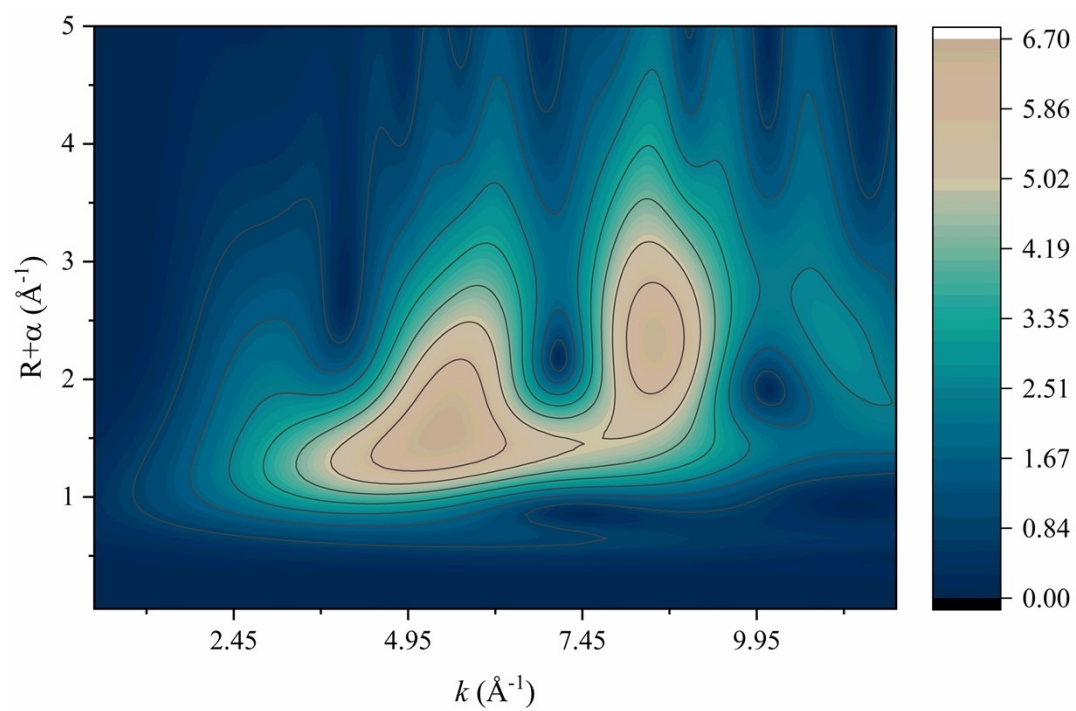

**Fig. S33.** Wavelet transforms for the  $k^3$ -weighted EXAFS signals of Cr for the control group Ni/Cr<sub>2</sub>O<sub>3</sub>.

## DFT calculations

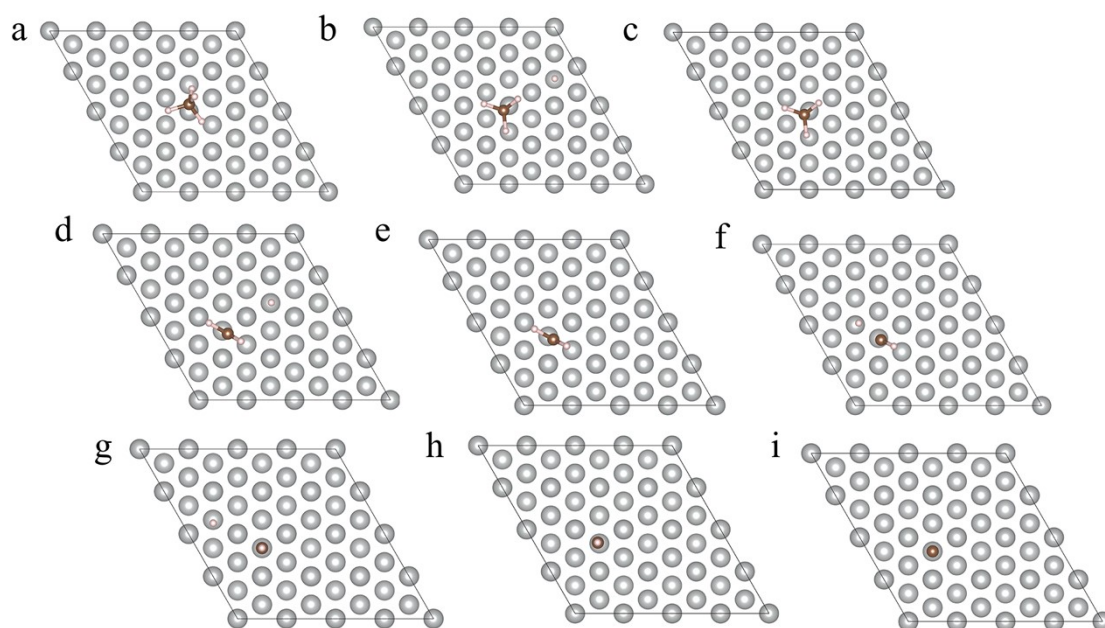

**Fig. S34.** Transition state images for CMD on Ni surfaces. Spheres: gray= Ni, pink= H, and dark brown= C.

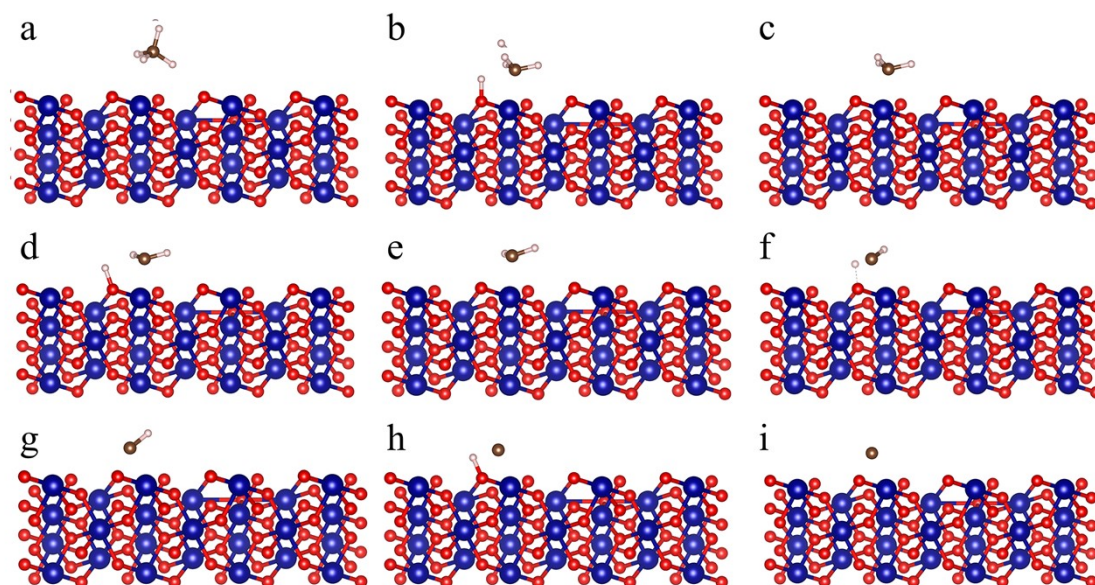

**Fig. S35.** Transition state images for CMD on  $\text{Cr}_2\text{O}_3$  surfaces. Spheres: blue= Cr, red= O, pink= H, and dark brown= C.

**Table S1.** Cell parameters of DFT model.

| Sample                                  | Space group  | Cell parameters                                                                                                   |
|-----------------------------------------|--------------|-------------------------------------------------------------------------------------------------------------------|
| Ni bulk                                 | $Fm\bar{3}m$ | $a=b=c=3.835 \text{ \AA}$ , $\alpha=\beta=\gamma=90^\circ$                                                        |
| $Cr_2O_3$ bulk                          | $R\bar{3}c$  | $a=b=5.03 \text{ \AA}$ , $c=13.702 \text{ \AA}$ , $\alpha=\beta=90^\circ$ ,<br>$\gamma=120^\circ$                 |
| $Cr_2O_3(012)$ and<br>$Ni@Cr_2O_3(012)$ |              | $a=13.25700 \text{ \AA}$ , $b=9.30640 \text{ \AA}$ , $c=20.26710 \text{ \AA}$ ,<br>$\alpha=\beta=\gamma=90^\circ$ |
| Ni(111)                                 |              | $a=b=9.75810 \text{ \AA}$ , $c=20.97560 \text{ \AA}$ , $\alpha=\beta=90^\circ$ ,<br>$\gamma=120^\circ$            |

**Table S2.** Metal contents of the  $Ni_xCr_2$  catalysts.

| Sample   | Theoretical Ni:<br>Cr ratio | Actual Ni:Cr ratio |
|----------|-----------------------------|--------------------|
| Ni0.4Cr2 | 0.20                        | 0.19               |
| Ni0.8Cr2 | 0.40                        | 0.43               |
| Ni1.2Cr2 | 0.60                        | 0.56               |
| Ni1.6Cr2 | 0.80                        | 0.76               |
| Ni2.0Cr2 | 1.00                        | 1.02               |

**Table S3.** Physiochemical properties of the  $H_2$  reduced  $Ni_xCr_2$  catalysts.

| Sample   | BET Surface<br>area ( $m^2/g$ ) | Pore volume<br>( $cm^3/g$ ) | Pore<br>diameter<br>(nm) | Ni Crystallite<br>size (nm) <sup>a</sup> |
|----------|---------------------------------|-----------------------------|--------------------------|------------------------------------------|
| Ni0.4Cr2 | 7.5                             | 0.027                       | 14.5                     | 24.3                                     |
| Ni0.8Cr2 | 6.4                             | 0.022                       | 13.5                     | 25.2                                     |
| Ni1.2Cr2 | 4.9                             | 0.020                       | 16.9                     | 22.6                                     |

|          |     |       |      |      |
|----------|-----|-------|------|------|
| Ni2.0Cr2 | 4.5 | 0.016 | 14.4 | 35.8 |
|----------|-----|-------|------|------|

<sup>a</sup> Determined by Scherrer's equation.

**Table S4.** Summary of BET characteristics of the 1h reacted Ni1.2Cr2 catalysts.

| Sample           | BET Surface area<br>(m <sup>2</sup> /g) | Pore volume<br>(cm <sup>3</sup> /g) | Pore diameter<br>(nm) |
|------------------|-----------------------------------------|-------------------------------------|-----------------------|
| reacted Ni0.4Cr2 | 18.3                                    | 0.066                               | 14.5                  |
| reacted Ni0.8Cr2 | 21.5                                    | 0.067                               | 12.5                  |
| reacted Ni1.2Cr2 | 15.4                                    | 0.064                               | 16.6                  |
| reacted Ni2.0Cr2 | 14.3                                    | 0.040                               | 11.4                  |

**Table S5.** Summary of XPS characteristics of reduced Ni1.2Cr2 and Ni/Cr<sub>2</sub>O<sub>3</sub> catalysts.

| Sample                                    | OI   | OII  | OIII | OII/OI |
|-------------------------------------------|------|------|------|--------|
| reduced Ni1.2Cr2                          | 0.56 | 0.35 | 0.09 | 0.63   |
| reduced Ni/Cr <sub>2</sub> O <sub>3</sub> | 0.60 | 0.24 | 0.16 | 0.40   |

**Table S6.** The coordination parameters of Ni for investigated samples

| Sample                            | Coordination type | Coordination number | R (Å) | σ <sup>2</sup> | ΔE (eV) | R-factor |
|-----------------------------------|-------------------|---------------------|-------|----------------|---------|----------|
| Ni-foil                           | Ni-Ni             | 12                  | 2.48  | 0.00627        | 6.39    | 0.23%    |
| NiO                               | Ni-Ni             | 12                  | 2.95  | 0.00710        | 4.23    | 0.15%    |
|                                   | Ni-O              | 6                   | 2.07  | 0.00705        | 5.34    |          |
| Ni/Cr <sub>2</sub> O <sub>3</sub> | Ni-O              | 5.6                 | 1.89  | 0.00300        | 15      | 3.30%    |
|                                   | Ni-Cr             | 3.5                 | 2.03  | 0.00300        | 6       |          |

|                                           |       |     |      |         |    |       |
|-------------------------------------------|-------|-----|------|---------|----|-------|
|                                           | Ni-Ni | 2.3 | 3.38 | 0.00300 | 6  |       |
|                                           | Ni-O  | 7.9 | 1.93 | 0.00300 | 15 |       |
| reduced Ni <sub>1.2</sub> Cr <sub>2</sub> | Ni-Cr | 2.5 | 2.90 | 0.00300 | 6  | 6.91% |
|                                           | Ni-Ni | 2.9 | 3.43 | 0.00300 | 6  |       |

**Table S7.** The coordination parameters of Cr for investigated samples

| Sample                                    | Coordination type | Coordination number | R (Å) | $\sigma^2$ | $\Delta E$ (eV) | R-factor |
|-------------------------------------------|-------------------|---------------------|-------|------------|-----------------|----------|
| Cr-foil                                   | Cr-Cr             | 12                  | 12    | 0.00300    | 1.21            | 1.28%    |
| Cr <sub>2</sub> O <sub>3</sub>            | Cr-O              | 9.2                 | 1.99  | 0.00260    | 0.67            |          |
|                                           | Cr-Cr             | 1.5                 | 2.63  | 0.00330    | 7.56            | 0.72%    |
|                                           | Cr-Cr             | 5.2                 | 2.89  | 0.00300    | 5.68            |          |
| Ni/Cr <sub>2</sub> O <sub>3</sub>         | Cr-O              | 10.9                | 1.99  | 0.00300    | 0.21            |          |
|                                           | Cr-Cr             | 2.0                 | 3.11  | 0.00300    | 25.83           | 0.24%    |
|                                           | Cr-Ni             | 12.8                | 3.31  | 0.00300    | 32.54           |          |
| reduced Ni <sub>1.2</sub> Cr <sub>2</sub> | Cr-O              | 8.8                 | 1.97  | 0.00300    | 2.38            |          |
|                                           | Cr-Cr             | 3.3                 | 2.86  | 0.00300    | 16.58           | 1.48%    |
|                                           | Cr-Ni             | 2.3                 | 3.39  | 0.00300    | 1.0             |          |

**Table S8.** Transition state results of methane decomposition on Ni(111), Cr<sub>2</sub>O<sub>3</sub>(012), and Ni(111)/Cr<sub>2</sub>O<sub>3</sub>(012)

| Reaction                              | Reaction barrier(eV) |                                      |                                              |
|---------------------------------------|----------------------|--------------------------------------|----------------------------------------------|
|                                       | Ni(111)              | Cr <sub>2</sub> O <sub>3</sub> (012) | Ni(111)/Cr <sub>2</sub> O <sub>3</sub> (012) |
| CH <sub>4</sub> (g)→CH <sub>4</sub> * | -0.24                | -0.13                                | -0.19                                        |
| CH <sub>4</sub> *→TS-1                | 0.63                 | 0.76                                 | 0.42                                         |
| TS-1→CH <sub>3</sub> *                | -0.86                | -0.86                                | -0.64                                        |
| CH <sub>3</sub> *→TS-2                | 0.57                 | 0.91                                 | 0.26                                         |



|                        |       |       |       |
|------------------------|-------|-------|-------|
| TS-2→CH <sub>2</sub> * | -0.90 | -1.48 | -0.69 |
| CH <sub>2</sub> *→TS-3 | 0.49  | 0.95  | 0.35  |
| TS-3→CH*               | -0.81 | 1.07  | -0.69 |
| CH*→TS-4               | 0.20  | 0.29  | 0.36  |
| TS-4→C*                | -0.65 | -0.67 | -0.82 |

---
